## Partial Defect in the Cholesterol Side-Chain Cleavage Enzyme P450<sub>scc</sub> (CYP11A1) Resembling Nonclassic Congenital Lipoid Adrenal Hyperplasia

Taninee Sahakitrungruang,\* Meng Kian Tee,\* Piers R. Blackett, and Walter L. Miller

Department of Pediatrics (T.S., M.K.T., W.L.M.), University of California, San Francisco, San Francisco, California 94143; and Department of Pediatrics (P.R.B.), University of Oklahoma Health Sciences Center, Oklahoma City, Oklahoma 73104

**Context:** The cholesterol side-chain cleavage enzyme (P450<sub>scc</sub>), encoded by the *CYP11A1* gene, converts cholesterol to pregnenolone to initiate steroidogenesis. Genetic defects in P450<sub>scc</sub> cause a rare autosomal recessive disorder that is clinically indistinguishable from congenital lipoid adrenal hyperplasia (lipoid CAH). Nonclassic lipoid CAH is a recently recognized disorder caused by mutations in the steroidogenic acute regulatory protein (StAR) that retain partial function.

**Objective:** We describe two siblings with hormonal findings suggesting nonclassic lipoid CAH, who had a P450<sub>scc</sub> mutation that retains partial function.

**Patients and Methods:** A 46,XY male presented with underdeveloped genitalia and partial adrenal insufficiency; his 46,XX sister presented with adrenal insufficiency. Hormonal studies suggested nonclassic lipoid CAH. Sequencing of the *StAR* gene was normal, but compound heterozygous mutations were found in the *CYP11A1* gene. Mutations were recreated in the F2 plasmid expressing a fusion protein of the cholesterol side-chain cleavage system. P450<sub>scc</sub> activity was measured as V<sub>max</sub>/K<sub>m</sub> for pregnenolone production in transfected COS-1 cells.

**Results:** The patients were compound heterozygous for the previously described frameshift mutation 835delA and the novel missense mutation A269V. When expressed in the P450<sub>scc</sub> moiety of F2, the A269V mutant retained 11% activity of the wild-type F2 protein.

**Conclusions:** There is a broad clinical spectrum of P450<sub>scc</sub> deficiency. Partial loss-of-function *CYP11A1* mutation can present with a hormonal phenotype indistinguishable from nonclassic lipoid CAH. (*J Clin Endocrinol Metab* 96: 792–798, 2011)

Steroidogenesis is initiated by converting cholesterol to pregnenolone by the cholesterol side-chain cleavage enzyme, P450<sub>scc</sub>, encoded by the single *CYP11A1* gene on chromosome 15q23-24 (1–3). Mitochondrial cytochrome P450<sub>scc</sub> catalyzes three consecutive reactions: 20 $\alpha$ -hydroxylation, 22-hydroxylation, and scission of the C20,22 carbon bond. Each of these reactions requires a pair of electrons donated by reduced nicotinamide adenine dinucleotide via an electron transfer chain consisting of a

flavoprotein termed ferredoxin [adrenodoxin (Adx)] reductase (AdRed) and an iron-sulfur protein termed ferredoxin (Adx) (reviewed in Ref. 4). Congenital lipoid adrenal hyperplasia (lipoid CAH) is a severe autosomal recessive disorder that disrupts the synthesis of all adrenal and gonadal steroids, including glucocorticoids, mineralocorticoids, and sex steroids (reviewed in Ref. 5) and typically features massively enlarged adrenals filled with lipids (6, 7). Because these patients appeared to have a

ISSN Print 0021-972X ISSN Online 1945-7197

Printed in U.S.A.

Copyright © 2011 by The Endocrine Society

doi: 10.1210/jc.2010-1828 Received August 5, 2010. Accepted November 18, 2010.

First Published Online December 15, 2010

\* T.S. and M.K.T. made equal contributions and should be considered co-first authors.

Abbreviations: Adx, Adrenodoxin; AdRed, Adx reductase; lipoid CAH, congenital lipoid adrenal hyperplasia; K<sub>m</sub>, Michaelis constant; StAR, steroidogenic acute regulatory protein; V<sub>max</sub>, maximum velocity.

lesion in the conversion of cholesterol to pregnenolone, it was initially thought to be caused by a lesion in the enzyme(s) converting cholesterol to pregnenolone, and hence was termed “20,22 desmolase deficiency” (7–9). Studies of the biochemistry of this reaction showed that it was catalyzed by P450scc (reviewed in Ref. 10), but analysis of the *CYP11A1* gene encoding P450scc found no mutations (11–13). Instead, patients with lipoid CAH have mutations in the gene encoding the steroidogenic acute regulatory protein (StAR) (14–17), which facilitates the transport of cholesterol into mitochondria (reviewed in Ref. 18), where cholesterol is converted to pregnenolone by P450scc. A milder form of this disease, termed nonclassic lipoid CAH, is a recently recognized disorder caused by StAR mutations that retain partial activity (19–21). StAR is expressed in the adrenals and gonads but not in the placenta (22). Because placental production of progesterone is essential for the maintenance of human pregnancy, mutations in P450scc were thought to be incompatible with term gestation. Nevertheless, beginning in 2001 several patients with defects in *CYP11A1* gene causing P450scc deficiency have been reported (23–28). Most of these cases were caused by severe loss-of-function mutations and presented with severe, early onset adrenal failure and complete phenotypic 46,XY sex reversal in genetic males (27), although one patient with late-onset nonclassic disease has been reported (28). We now describe two siblings who appeared to have nonclassic lipoid CAH, but instead had a mutation in P450scc that retained partial activity.

## Patients and Methods

### Case reports

The patients were siblings from a nonconsanguineous Hispanic family. Patient 1 was a 9-yr-old 46,XY male with micropenis, severe hypospadias, bifid scrotum, and cryptorchidism. He was previously evaluated for his abnormal genital development and had six surgical operations at ages 1–5 in Mexico for repair of the genitalia, but no medical records from Mexico were available. Attempted orchidopexy had been unsuccessful on the left, but the right testis was brought down to the inguinal region. The scrotum had always been small. At about 8 yr of age, he had a severe viral infection treated with hydrocortisone. There was no family history of hypospadias or ambiguous genitalia. His family emigrated to the United States, and he was first evaluated at the University of Oklahoma Children's Hospital at age 9 yr and 9 months for hypogonadism and hyperpigmentation. At that time, he had been untreated; his height was 141.1 cm (+0.58 SD), his weight was 34.0 kg, (+0.65 SD), blood pressure was 107/66 (75/75 percentile), and pulse rate was 84. The physical examination was normal except that the penis was 2.3 cm long (< –2.5 SD) and 1.3 cm wide; the scrotum was bifid; the left testis had been removed, but the right testis was palpable in the inguinal region and was approximately 0.5 ml in volume. The areola and palmar

creases were pigmented bilaterally. An ACTH stimulation test at age 9 yr showed normal basal cortisol [9  $\mu$ g/dl (250 nmol/liter)] with grossly elevated basal ACTH [1507 pg/ml (335 pmol/liter)]. After receipt of 250  $\mu$ g of cosyntropin, the cortisol was 10  $\mu$ g/dl (276 nmol/liter), pregnenolone was below 20 ng/dl (<630 pmol/liter), progesterone was below 10 ng/dl (<318 pmol/liter), 17 OH-pregnenolone was below 10 ng/dl (<300 nmol/liter), 17 OH-progesterone was below 5 ng/dl (<150 pmol/liter), dehydroepiandrosterone sulfate was 19  $\mu$ g/dl (517 nmol/liter), and androstenedione was 23 ng/dl (803 pmol/liter). The serum sodium was 134 mmol/liter, and plasma renin activity shortly after starting treatment was 6400 ng/dl  $\cdot$  h (normal range, 70–330). He was treated with hydrocortisone, 5 mg three times daily (10 mg/m<sup>2</sup>  $\cdot$  d), and 9 $\alpha$ -fluorocortisol, 0.1 mg daily, and referred for urological assessment. When seen at age 14 yr, the genitalia were prepubertal. Testosterone was less than 3.0 ng/dl (<104 pmol/liter), LH was 40.9 mIU/ml, and FSH was 87.2 mIU/ml. The right testis, still located near the inguinal canal, was 2 ml in volume, and the penis measured 3 cm in length and was 0.5 cm in width. He was treated with testosterone cypionate, 100 mg every 4 wk for 3 months, which was then increased to 200 mg every 4 wk. By age 16 yr, the penile length had increased to 6 cm but was retracted into pubic fat tissue. Abdominal computed tomographic imaging showed slightly small adrenals with stippled calcifications.

Patient 2 is the 5-yr-old sister of patient 1. She was being treated with hydrocortisone, 5 mg twice daily (14.5 mg/m<sup>2</sup>  $\cdot$  d), and 9 $\alpha$ -fluorocortisol, 0.1 mg/d for Addison's disease, which had been previously diagnosed in Mexico at the age of 12 months, but medical records were not available. When first seen at age 5 yr and 4 months, her height was 116.2 cm (+1.29 SD), and weight was 21.1 kg (+1.05 SD). Her physical examination was normal with normal prepubertal female genitalia. Mild pigmentation appeared consistent with her ethnicity. Her pulse rate was 99 and blood pressure was 107/68 (75/75 percentile). The ACTH was 275 pg/ml (61.1 pmol/liter), indicating incomplete suppression by hydrocortisone. The ACTH at a subsequent visit was 156 pg/ml (34.7 pmol/liter) but increased again to 446 pg/ml (99.1 pmol/liter) with plasma renin activity below 20 ng/dl  $\cdot$  h. When seen at the age of 11.5 yr, she remained prepubertal and her growth was tracking just below the 25th percentile for height and weight while continuing treatment with adjusted doses of hydrocortisone at 15 mg/m<sup>2</sup>  $\cdot$  d and 9 $\alpha$ -fluorocortisol at 0.1 mg/d. Her karyotype was 46,XX, and abdominal computed tomographic imaging showed small adrenals with diffuse multiple punctate calcifications. Adrenal hypoplasia congenita due to an X-linked DAX-1 mutation was excluded by the presence of an affected female sibling and by the genital abnormality in the male, and steroidogenic factor 1 mutations typically cause 46,XY disordered sexual development without adrenal insufficiency (29); therefore, a lesion in StAR or P450scc was considered.

### DNA sequencing

With Institutional Review Board approval and informed consent, leukocyte genomic DNA was extracted and all protein-coding exons and at least 100 bp of flanking intronic DNA of the *StAR* and *CYP11A1* genes were amplified by PCR using previously described primers and conditions (23, 25, 30). The sizes of the PCR products were confirmed by electrophoresis in 1.5% agarose gel. The PCR products were treated with exonuclease I and shrimp alkaline phosphatase (ExoSAP-IT; USP Corp., Cleveland, OH) and sequenced, and the data were analyzed us-

ing Sequencer version 4.2 (Gene Codes, Ann Arbor, MI), compared with reference cDNA (1) and gene (2) sequences.

To determine whether the identified mutations lie on different DNA strands, a 1005-bp fragment encompassing exons 4 and 5, which spanned both mutations, was amplified from genomic DNA using primer pair sense 5'-ATAGGATCCCCGAGGCCAGC-GATTCA and antisense 5'-ATACTCGAGGTGGGCA-CAGGGGGCAACAAG. The PCR products were digested with *Bam*HI and *Xho*I, ligated to pcDNA3.1, and propagated in *Escherichia coli*. Plasmid DNAs isolated from four individual colonies were sequenced on both strands.

### Construction of P450scc expression vectors

The A269V mutant of P450scc was recreated in the F2 plasmid expressing a fusion protein of the cholesterol side-chain cleavage system (H<sub>2</sub>N-P450scc-adrenodoxin reductase-adrenodoxin-COOH) (31) by PCR-based, site-directed mutagenesis using the primers 5'-GACCATGTGGCTGTATGGGACGTGATT and 5'-AATCACGTCCCATACAGCCACATGGTC. The methylated parental wild-type cDNA was digested with 10 U *Dpn*I at 37°C for 180 min, and the remaining unmethylated mutagenized cDNA plasmid was used to transform *E. coli* DH5 $\alpha$  cells. The mutagenized cDNAs were verified by sequencing.

### Functional studies of P450scc activity

Nonsteroidogenic monkey kidney COS-1 cells were grown in DMEM supplemented with 10% fetal calf serum and antibiotics at 37°C in a humidified 5% CO<sub>2</sub> incubator. Cells were divided into 12-well plates (Falcon; BD Biosciences, Lincoln Park, NJ) and transfected at approximately 50% confluence with either the wild-type or mutant F2 plasmid using Effectene (QIAGEN, Valencia, CA). To monitor transfection efficiency, cells were also cotransfected with 5 ng of *Renilla* luciferase reporter plasmid (pRL-CMV) (Promega, Madison, WI) per well. After 24 h, the culture medium was replaced with fresh serum-free medium containing 0.3, 1, 3, or 5  $\mu$ M 22R-hydroxycholesterol, which bypasses the action of StAR and is converted to pregnenolone by P450scc (14, 32). Culture media were collected 24 h later and analyzed for pregnenolone production by enzyme immunoassay (ALPCO Diagnostics, Salem, NH). Assays were done in the linear range of the standard curve. Cross-reactivity with progesterone, dehydroepiandrosterone, and 5 $\alpha$ -androstenediol were less than 6%, and the sensitivity of this assay was 5.4 ng/dl. The data were normalized to *Renilla* luciferase measurements, thus normalizing for the efficiency of transfection. Lineweaver-Burke analyses were done using the GraphPad Prism 3 (GraphPad Software, San Diego, CA), and data are presented as the mean  $\pm$  SEM for three independent experiments. Statistical analyses were done with two-tailed, unpaired *t* tests.

## Results

### Mutational analysis

DNA sequencing of coding regions and splice sites of the *StAR* gene showed no mutations in both siblings. Both patients were compound heterozygous for the novel *CYP11A1* missense mutation 806C>T in exon 4 (as numbered from the first base in the ATG start codon) (1),

changing alanine 269 to valine (A269V) and the frameshift mutation 835delA in exon 5, which was reported previously (25, 27). According to NCBI reference sequence NC\_000015.9, 806C>T is at position 23928 and 835delA is at 24608. Parental DNA was not available for mutation analysis. Therefore, to determine whether the patients were compound heterozygotes, we amplified adjacent exons 4 and 5 that contained the mutations as a single fragment, cloned the DNA, and then sequenced four clones. All clones carried only one of the two identified mutations, proving that they lie on separate alleles.

### Studies of P450scc enzyme activity

To catalyze the conversion of cholesterol to pregnenolone, P450scc requires the presence of two electron transfer proteins, Adx and AdRed (4). Because the relative abundances of Adx and AdRed influence P450scc activity in transfected cells (31, 33), we used a single plasmid, termed F2, expressing a fusion protein of the cholesterol side-chain cleavage system (H<sub>2</sub>N-P450scc-AdRed-Adx-COOH) (31). This fixes the molar ratio of the three components at 1:1:1, thus eliminating variations in the level of cofactor expression as a source of potential variation in P450scc activity. The A269V mutation was recreated in the P450scc moiety of the F2 vector by site-directed mutagenesis; then wild-type and mutant F2 plasmids were separately transfected into COS-1 cells, incubated with 0.3, 1, 3, and 5  $\mu$ M 22R-hydroxycholesterol for 24 h, and assayed for the production of pregnenolone by enzyme immunoassay. Because the assays involve intact cells rather than purified enzyme of known mass, the data yield only “apparent” kinetic parameters. Lineweaver-Burke analyses (Fig. 1) showed that the differences in the apparent Michaelis constant (*K*<sub>m</sub>), maximal velocity (*V*<sub>max</sub>), and *V*<sub>max</sub>/*K*<sub>m</sub> of F2 compared with A269V-F2 were significantly different (Table 1). After 24-h incubation, only 3.2% of the 22R-hydroxycholesterol was converted to pregnenolone in cells transfected with the wild-type F2 construct; hence, substrate was not limiting, and thus the mutant activities were not overestimated. As assessed by *V*<sub>max</sub>/*K*<sub>m</sub>, the A269V mutant had 11% activity of wild-type activity. One might consider that the presence of a normal StAR protein will result in conditions of substrate excess, so that only the reduced *V*<sub>max</sub> indicates loss of P450scc activity; by this assessment, the mutant retained 29% of wild-type activity.

## Discussion

P450scc deficiency is a rare disorder, with only seven patients described to date (23–28). Most cases of P450scc deficiency have presented with the hormonal and pheno-

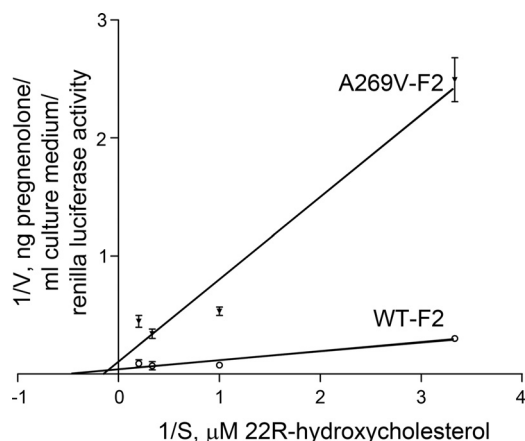

**FIG. 1.** Lineweaver-Burke analyses of the side-chain cleavage activities of F2 and A269V-F2. COS-1 cells were cotransfected with either the wild-type F2 construct and *Renilla* luciferase or the A269V-F2 construct and *Renilla* luciferase, and incubated with 0.3, 1, 3, and 5  $\mu$ M 22R-hydroxycholesterol for 24 h. Pregnenolone in the medium was measured by enzyme immunoassay and normalized to the *Renilla* luciferase activity, and the data are displayed as Lineweaver-Burke plots. The data are expressed as means  $\pm$  SEM from three independent experiments.

typic features of classic lipid CAH, although none have been described with the massive adrenal enlargement typical of lipid CAH (27). However, the most recent report of P450scc deficiency described a nonclassic presentation in a 46,XY male with hypospadias, cryptorchidism, and adrenal failure at 9 yr associated with a homozygous L222P mutation (28). We describe two patients with nonclassic P450scc deficiency, who carried the novel missense mutation A269V on one allele and a frameshift mutation devoid of activity on the other allele.

Lipoid CAH, which closely resembles P450scc deficiency clinically, is caused by StAR mutations. Both are very severe forms of CAH (14, 15, 27), leading to the severe impairment of all adrenal and gonadal steroid hormone synthesis. Patients with the “classic” forms of both P450scc deficiency and lipoid CAH typically present with adrenal failure and salt wasting in infancy and are phenotypically female irrespective of genetic sex. Nonclassic lipoid CAH is a recently recognized disorder

caused by partial loss-of function mutations in StAR (19–21). Affected individuals can present with late onset adrenal insufficiency resembling Addison disease with only mild or minimally disordered sexual development. Similarly, nonclassic P450scc deficiency presents after infancy with varying degrees of retained adrenal and gonadal function.

Functional assays using the F2 fusion protein of the P450scc system in transfected COS-1 cells showed that P450scc A269V retained 11% of wild-type activity as assessed by  $V_{max}/K_m$ , or 29% of wild-type activity as assessed by  $V_{max}$  alone; the 835delA mutation is devoid of activity, as expected (21). A previously reported 46,XY phenotypically female patient (patient 5) was a compound heterozygote for the P450scc mutations V415E and L141W; as assessed by  $V_{max}$  alone in the F2 system, V415E had no measureable activity and L141W retained 39% of wild-type activity (27). The retained activity in that phenotypically female patient was slightly greater than that in our partially virilized patient. It is not uncommon to find apparent discrepancies between genotype and phenotype when examining individual patients. Such comparisons in CAH due to 21-hydroxylase deficiency plagued that field for several years, until comparisons of large numbers of patients showed excellent genotype/phenotype correlations. However, this is not yet possible with P450scc, with less than a dozen reported cases.

There has been a relatively poor correlation between the clinical findings and the enzymology of the mutations in the previously reported cases of P450scc deficiency (27). This may be attributable to technical dif-

|                     |                                     |
|---------------------|-------------------------------------|
| human CYP27A1       | --FWKRYLDGWNAINFSFGKKL              |
| human CYP24A1       | TKVWQGH <del>TL</del> AWDTIFKSVKAC  |
| human CYP27B1       | G-PWGRLCDWDQMFAFAQRH                |
| human CYP11B1/B2    | PKVWKEHFEAWDCIFQYGDNC               |
| human CYP11A1       | TKTWKDHVA <del>AWD</del> VIFSKADY   |
| bovine Cyp11a1      | TKTWRDHVA <del>AWD</del> TIFNKAKEY  |
| sheep Cyp11a1       | TKTWRDHVA <del>AWD</del> TIFNKAKEY  |
| mouse Cyp11a1       | TKTWKDHAA <del>AWD</del> VIFNKADEY  |
| chicken Cyp11a1     | TKTWRDHVHA <del>AWD</del> AIFTQADKC |
| zebra finch Cyp11a1 | SRTWREHVHA <del>AWD</del> AIFCQADKC |
| lizard Cyp11a1      | SKTWQDHIT <del>AWD</del> IIFMQADKC  |
| crocodile Cyp11a1   | SKTWQDHVKA <del>AWD</del> VIFMQADKC |
| zebrafish Cyp11a1   | SNIWKNHVE <del>AWD</del> GIFNQADRY  |

**FIG. 2.** Sequence alignment of human mitochondrial P450 enzymes with human P450scc and with the P450scc proteins from other species. The alignment of the human mitochondrial P450 enzymes is taken directly from Fu *et al.* (39). CYP27A1 is sterol 27-hydroxylase (40); CYP24 is 1,25 dihydroxyvitamin D 24-hydroxylase (41); CYP27B1 is 25-hydroxyvitamin D 1 $\alpha$ -hydroxylase (39); CYP11B1 and CYP11B2, whose sequences are identical in the region shown, are steroid 11 $\beta$ -hydroxylase and aldosterone synthase, respectively (42). Residue 269 in the human protein and corresponding residues in the other species are **bold and underlined**. The alignment of P450scc from the indicated species was performed by a BLAST search of the NCBI database (<http://www.ncbi.nlm.nih.gov>) using *Homo sapiens* P450scc, accession NP\_000772.2, as the reference sequence (1).

**TABLE 1.** Catalytic activities of wild-type F2 and F2 carrying the A269V P450scc mutant in the conversion of 22R-hydroxycholesterol to pregnenolone in transfected COS-1 cells

|                                                                                                            | Wild-type<br>F2  | A269V-F2         | P<br>value |
|------------------------------------------------------------------------------------------------------------|------------------|------------------|------------|
| $K_m \pm \text{SEM} (\mu\text{M})$                                                                         | $2.57 \pm 0.622$ | $6.43 \pm 0.273$ | 0.0031     |
| $V_{max} \pm \text{SEM}$<br>(ng $\cdot$ ml $^{-1}$ $\cdot$ <i>Renilla</i><br>luciferase activity $^{-1}$ ) | $32.6 \pm 6.23$  | $9.30 \pm 1.02$  | 0.0006     |
| $V_{max}/K_m \pm \text{SEM}$                                                                               | $12.8 \pm 0.751$ | $1.44 \pm 0.104$ | <0.0001    |
| % Wild type                                                                                                | 100              | 11               |            |



ferences in the assays and the small number of patients studied to date. Among the reports of P450scc deficiency, three (24, 26, 28) used a triple transfection with equimolar amounts of three plasmids expressing P450scc, Adx, and AdRed, whereas our studies used the F2 system (Refs. 23, 27 and the present report). We find that using the single F2 plasmid expressing a fusion protein of the cholesterol side-chain cleavage system facilitates studying the functional consequences of P450scc mutations because the F2 system eliminates potential variations in the levels of cofactor expression, ensuring that any variations in mutant P450scc activity are due to the amino acid change rather than to variations in cofactor expression. Cells transfected with the F2 construct produce substantially more pregnenolone than do cells transfected with either P450scc alone or triply transfected with three vectors separately expressing P450scc, AdRed, and Adx, because the F2 fusion protein increases enzymatic activity by increasing the maximum velocity of the reaction (31). This provides a better ratio of signal to background, permitting more reliable measurement of the low activities of P450scc mutants. Nevertheless, assays in transfected cells may not fully reflect the complexity of events *in vivo*.

Ala269 is a highly conserved residue, directly preceding a tryptophan residue that is preserved among P450scc sequences from fish, birds, reptiles, and mammals and that is also conserved in all human mitochondrial P450 enzymes (Fig. 2). A crystal structure of P450scc with bound 22R-hydroxycholesterol has recently been posted on the Protein Data Bank (<http://www.pdb.org/pdb/explore/explore.do?structureId=3NA0>) (34). By assessing this structure with the program DSSP (Define Secondary Structure of Proteins) (35), Ala 269 is buried in an  $\alpha$ -helix and is not accessible to the protein's surface, and hence probably does not affect redox partner interactions. Thus, whereas substitution of Val for Ala is a conservative mutation that typically elicits minor effects on protein folding, we would hypothesize that the bulkier valine residue would interfere with a function of the conserved adjacent tryptophan, but the reason for this mutation's loss of activity is not clear. Similarly, the L, R, and V residues in the previously reported mutants L141W, L222P, R353W, and V415E (24, 27, 28) are also inaccessible to the protein's surface, whereas the A residues mutated in A189V and A359V (24, 26) are partially surface-exposed and hence might alter redox-partner interactions.

Human pregnancy depends on progesterone from the mother's corpus luteum during the first trimester, following which the placenta becomes the major source of

progesterone (36). P450scc is needed for placental progesterone production. Residual mutant P450scc activity seems to explain the term gestation in several cases of P450scc deficiency, although one patient with frame-shift mutations that ablated all activity was born at term (27). That case may be explained by an unusually long survival of the maternal corpus luteum. The exact mechanism of "turning on" placental progesterone synthesis is unclear, but it may relate to a shift of oxygen concentration (37) and requires the expression of *grainyhead* (LBP) transcription factors rather than steroidogenic factor-1 to induce CYP11A1 gene transcription (38).

Adrenal enlargement has been reported in virtually all patients with classic lipoid CAH caused by StAR mutations, although one patient with normal-sized adrenals has been reported (17). By contrast, such adrenal enlargement has not been reported in patients with P450scc deficiency, which is clinically indistinguishable from StAR mutations (27). Similarly, no patients with nonclassic lipoid CAH have had adrenal enlargement (19–21). By contrast, small adrenals with calcifications, as seen in our patients, suggesting cirrhotic, end-stage fat deposition, have been reported in nonclassic lipoid CAH (20). Therefore, in the setting of adrenal failure, enlarged adrenals indicate lipoid CAH due to StAR mutations; normal-sized adrenals cannot exclude it (17), but instead suggest nonclassic lipoid CAH or P450scc deficiency. Our cases illustrate that P450scc mutations can present with a broad spectrum of phenotypes, extending from classic lipoid CAH through a nonclassic phenotype presenting in males with hypogonadism and partial adrenal insufficiency.

## Acknowledgments

This work is dedicated to the memory of our friend and collaborator, Prof. Kenji Fujeda, who identified the first patient with a P450scc mutation (23).

Address all correspondence and requests for reprints to: Walter L. Miller, M.D., Professor of Pediatrics and Chief of Endocrinology, HSE 1427, University of California San Francisco, San Francisco, California 94143-0978. E-mail: [wmlab@ucsf.edu](mailto:wmlab@ucsf.edu).

This work was supported by National Institutes of Health Grant DK37922 (to W.L.M.). T.S. was supported by funds from Chulalongkorn University and by the University of California San Francisco Division of Pediatric Endocrinology.

Disclosure Summary: The authors have nothing to disclose.

## References

1. Chung BC, Matteson KJ, Voutilainen R, Mohandas TK, Miller WL. 1986 Human cholesterol side-chain cleavage enzyme, P450scc:

- cDNA cloning, assignment of the gene to chromosome 15, and expression in the placenta. *Proc Natl Acad Sci USA* 83:8962–8966
2. Morohashi K, Sogawa K, Omura T, Fujii-Kuriyama Y 1987 Gene structure of human cytochrome P-450(SCC), cholesterol desmolase. *J Biochem* 101:879–887
  3. Sparkes RS, Klisak I, Miller WL 1991 Regional mapping of genes encoding human steroidogenic enzymes: P450scc to 15q23-q24, adrenodoxin to 11q22; adrenodoxin reductase to 17q24-q25; and P450c17 to 10q24-q25. *DNA Cell Biol* 10:359–365
  4. Miller WL 2005 Minireview: regulation of steroidogenesis by electron transfer. *Endocrinology* 146:2544–2550
  5. Miller WL 1997 Congenital lipid adrenal hyperplasia: the human gene knockout for the steroidogenic acute regulatory protein. *J Mol Endocrinol* 19:227–240
  6. Sandison AT 1955 A form of lipoidosis of the adrenal cortex in an infant. *Arch Dis Child* 30:538–541
  7. Prader A, Gurtner HP 1955 Das Syndrom des Pseudohermaphroditismus masculinus bei kongenitaler Nebennierenrindenhyperplasie ohne Androgenüberproduktion (adrenaler Pseudohermaphroditismus masculinus). *Helv Paediatr Acta* 10:397–412
  8. Camacho AM, Kowarski A, Migeon CJ, Brough AJ 1968 Congenital adrenal hyperplasia due to a deficiency of one of the enzymes involved in the biosynthesis of pregnenolone. *J Clin Endocrinol Metab* 28:153–161
  9. Hauffa BP, Miller WL, Grumbach MM, Conte FA, Kaplan SL 1985 Congenital adrenal hyperplasia due to deficient cholesterol side-chain cleavage activity (20, 22-desmolase) in a patient treated for 18 years. *Clin Endocrinol (Oxf)* 23:481–493
  10. Miller WL 1988 Molecular biology of steroid hormone synthesis. *Endocr Rev* 9:295–318
  11. Matteson KJ, Chung BC, Urdea MS, Miller WL 1986 Study of cholesterol side-chain cleavage (20,22 desmolase) deficiency causing congenital lipid adrenal hyperplasia using bovine-sequence P450scc oligodeoxynucleotide probes. *Endocrinology* 118:1296–1305
  12. Lin D, Gitelman SE, Saenger P, Miller WL 1991 Normal genes for the cholesterol side chain cleavage enzyme, P450scc, in congenital lipid adrenal hyperplasia. *J Clin Invest* 88:1955–1962
  13. Sakai Y, Yanase T, Okabe Y, Hara T, Waterman MR, Takayanagi R, Haji M, Nawata H 1994 No mutation in cytochrome P450 side chain cleavage in a patient with congenital lipid adrenal hyperplasia. *J Clin Endocrinol Metab* 79:1198–1201
  14. Lin D, Sugawara T, Strauss 3rd JF, Clark BJ, Stocco DM, Saenger P, Rogol A, Miller WL 1995 Role of steroidogenic acute regulatory protein in adrenal and gonadal steroidogenesis. *Science* 267:1828–1831
  15. Bose HS, Sugawara T, Strauss 3rd JF, Miller WL 1996 The pathophysiology and genetics of congenital lipid adrenal hyperplasia. *N Engl J Med* 335:1870–1878
  16. Nakae J, Tajima T, Sugawara T, Arakane F, Hanaki K, Hotsubo T, Igarashi N, Igarashi Y, Ishii T, Koda N, Kondo T, Kohno H, Nakagawa Y, Tachibana K, Takeshima Y, Tsubouchi K, Strauss 3rd JF, Fujieda K 1997 Analysis of the steroidogenic acute regulatory protein (StAR) gene in Japanese patients with congenital lipid adrenal hyperplasia. *Hum Mol Genet* 6:571–576
  17. Bose HS, Sato S, Aisenberg J, Shalev SA, Matsuo N, Miller WL 2000 Mutations in the steroidogenic acute regulatory protein (StAR) in six patients with congenital lipid adrenal hyperplasia. *J Clin Endocrinol Metab* 85:3636–3639
  18. Miller WL 2007 StAR search—what we know about how the steroidogenic acute regulatory protein mediates mitochondrial cholesterol import. *Mol Endocrinol* 21:589–601
  19. Baker BY, Lin L, Kim CJ, Raza J, Smith CP, Miller WL, Achermann JC 2006 Nonclassic congenital lipid adrenal hyperplasia: a new disorder of the steroidogenic acute regulatory protein with very late presentation and normal male genitalia. *J Clin Endocrinol Metab* 91:4781–4785
  20. Metherell LA, Naville D, Halaby G, Begeot M, Huebner A, Nürnberg G, Nürnberg P, Green J, Tomlinson JW, Krone NP, Lin L, Racine M, Berney DM, Achermann JC, Arlt W, Clark AJ 2009 Nonclassic lipid congenital adrenal hyperplasia masquerading as familial glucocorticoid deficiency. *J Clin Endocrinol Metab* 94:3865–3871
  21. Sahakitrungruang T, Soccio RE, Lang-Muritano M, Walker JM, Achermann JC, Miller WL 2010 Clinical, genetic, and functional characterization of four patients carrying partial loss-of-function mutations in the steroidogenic acute regulatory protein (StAR). *J Clin Endocrinol Metab* 95:3352–3359
  22. Sugawara T, Holt JA, Driscoll D, Strauss 3rd JF, Lin D, Miller WL, Patterson D, Clancy KP, Hart IM, Clark BJ 1995 Human steroidogenic acute regulatory protein: functional activity in COS-1 cells, tissue-specific expression, and mapping of the structural gene to 8p11.2 and a pseudogene to chromosome 13. *Proc Natl Acad Sci USA* 92:4778–4782
  23. Tajima T, Fujieda K, Kouda N, Nakae J, Miller WL 2001 Heterozygous mutation in the cholesterol side chain cleavage enzyme (P450scc) gene in a patient with 46,XY sex reversal and adrenal insufficiency. *J Clin Endocrinol Metab* 86:3820–3825
  24. Katsumata N, Ohtake M, Hojo T, Ogawa E, Hara T, Sato N, Tanaka T 2002 Compound heterozygous mutations in the cholesterol side-chain cleavage enzyme gene (CYP11A) cause congenital adrenal insufficiency in humans. *J Clin Endocrinol Metab* 87:3808–3813
  25. Hiort O, Holterhus PM, Werner R, Marschke C, Hoppe U, Partsch CJ, Riepe FG, Achermann JC, Struve D 2005 Homozygous disruption of P450 side-chain cleavage (CYP11A1) is associated with prematurity, complete 46,XY sex reversal, and severe adrenal failure. *J Clin Endocrinol Metab* 90:538–541
  26. al Kandari H, Katsumata N, Alexander S, Rasoul MA 2006 Homozygous mutation of P450 side-chain cleavage enzyme gene (CYP11A1) in 46, XY patient with adrenal insufficiency, complete sex reversal, and agenesis of corpus callosum. *J Clin Endocrinol Metab* 91:2821–2826
  27. Kim CJ, Lin L, Huang N, Quigley CA, AvRuskin TW, Achermann JC, Miller WL 2008 Severe combined adrenal and gonadal deficiency caused by novel mutations in the cholesterol side chain cleavage enzyme, P450scc. *J Clin Endocrinol Metab* 93:696–702
  28. Rubtsov P, Karmanov M, Sverdlova P, Spirin P, Tiulpakov A 2009 A novel homozygous mutation in CYP11A1 gene is associated with late-onset adrenal insufficiency and hypospadias in a 46,XY patient. *J Clin Endocrinol Metab* 94:936–939
  29. Lin L, Gu WX, Ozisik G, To WS, Owen CJ, Jameson JL, Achermann JC 2006 Analysis of DAX1 (NR0B1) and steroidogenic factor-1 (NR5A1) in children and adults with primary adrenal failure: ten years' experience. *J Clin Endocrinol Metab* 91:3048–3054
  30. Bose HS, Pescovitz OH, Miller WL 1997 Spontaneous feminization in a 46,XX female patient with congenital lipid adrenal hyperplasia due to a homozygous frameshift mutation in the steroidogenic acute regulatory protein. *J Clin Endocrinol Metab* 82:1511–1515
  31. Harikrishna JA, Black SM, Szklarz GD, Miller WL 1993 Construction and function of fusion enzymes of the human cytochrome P450scc system. *DNA Cell Biol* 12:371–379
  32. Toaff ME, Schleyer H, Strauss 3rd JF 1982 Metabolism of 25-hydroxycholesterol by rat luteal mitochondria and dispersed cells. *Endocrinology* 111:1785–1790
  33. Zuber MX, Mason JL, Simpson ER, Waterman MR 1988 Simultaneous transfection of COS-1 cells with mitochondrial and microsomal steroid hydroxylases: incorporation of a steroidogenic pathway into non-steroidogenic cells. *Proc Natl Acad Sci USA* 85:699–703
  34. Strushkevich NV, MacKenzie F, Tempel W, Botchkarev A, Arrow-smith CH, Edwards AM, Bountra C, Weigelt JU, Park H, Structural Genomics Consortium (SGC) 2010 Crystal structure of human CYP11A1 in complex with 20,22-dihydroxycholesterol. DOI: 10.2210/pdb3na0/pdb
  35. Kabsch W, Sander C 1983 Dictionary of protein secondary structure: pattern recognition of hydrogen-bonded and geometrical features. *Biopolymers* 22:2577–2637
  36. Csapo AI, Pulkkinen MO, Wiest WG 1973 Effects of luteectomy and progesterone replacement therapy in early pregnant patients. *Am J Obstet Gynecol* 115:759–765

37. Tuckey RC 2005 Progesterone synthesis by the human placenta. *Placenta* 26:273–281
38. Huang N, Miller WL 2000 Cloning of factors related to HIV-inducible LBP proteins that regulate steroidogenic factor-1-independent human placental transcription of the cholesterol side-chain cleavage enzyme, P450<sub>sc</sub>. *J Biol Chem* 275:2852–2858
39. Fu GK, Lin D, Zhang MY, Bikle DD, Shackleton CH, Miller WL, Portale AA 1997 Cloning of human 25-hydroxyvitamin D-1 $\alpha$ -hydroxylase and mutations causing vitamin D-dependent rickets type 1. *Mol Endocrinol* 11:1961–1970
40. Cali JJ, Russell DW 1991 Characterization of human sterol 27-hydroxylase. A mitochondrial cytochrome P450 that catalyzes multiple oxidation reactions in bile acid synthesis. *J Biol Chem* 266:7774–7778
41. Chen KS, Prahl JM, DeLuca HF 1993 Isolation and expression of human 1,25 dihydroxyvitamin D<sub>3</sub> 24-hydroxylase cDNA. *Proc Natl Acad Sci USA* 90:4543–4547
42. Mornet E, Dupont J, Vitek A, White PC 1989 Characterization of two genes encoding human steroid 11 $\beta$ -hydroxylase (P-450<sub>11 $\beta$</sub> ). *J Biol Chem* 264:20961–20967

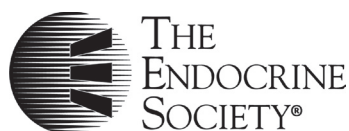

Go to the *Translational Research in Endocrinology & Metabolism* site for a collection of articles from The Endocrine Society journals

[www.endojournals.org/trem](http://www.endojournals.org/trem)
